# Reproductive strategies in vent shrimps shaped by feeding ecology with intriguing seasonality unlinked to surface productivity

## Authors and Affiliations

Pierre Methou<sup>1,2,3</sup>, Chong Chen<sup>3</sup>, Hiromi K. Watanabe<sup>3</sup>, Marie-Anne Cambon-Bonavita<sup>1</sup>, Florence Pradillon<sup>2</sup>

<sup>1</sup>: Ifremer, Univ Brest, CNRS, Laboratoire de Microbiologie des Environnements Extrêmes, UMR6197, 29280 Plouzané, France

<sup>2</sup>: Ifremer, Centre Brest, Laboratoire Environnements Profonds (REM/EEP/LEP), ZI de la pointe du diable, 29280 Plouzané, France

<sup>3</sup>: X-STAR, Japan Agency for Marine-Earth Science and Technology (JAMSTEC), Yokosuka, 237-0061, Japan

## Abstract

Variations in reproductive patterns according to feeding strategies or food supply have been recognized in many animals from various ecosystems. Despite an unusual trophic structure, these relationships remain largely under-studied in chemosynthetic ecosystems. Here, we use *Rimicaris* shrimps as a study case to explore relations between reproduction, diets and food supply in these environments. For that, we compiled data on presence of reproductive individuals from the past 35 years and compared reproductive outputs of three shrimps differing by their diets and regions. We report distinct reproductive patterns between *Rimicaris* species according to their trophic regime regardless of variations related to body size. Besides, we observed a reproductive period mostly between January and early April whatever the region. Intriguingly, this periodicity does not correspond to seasonal variations with presence of ovigerous females during either boreal winter or austral summer. These observations contrast with the long-standing paradigm in deep-sea species for which periodic reproductive patterns have always been attributed to seasonal variations of photosynthetic production sinking from surface. Our results suggest the presence of intrinsic basis for biological rhythms in the deep sea, and bring to light the importance of having year-round observations in order to understand life history of vent animals.

## Keywords

Biological rhythms, crustacean, deep sea, hydrothermal vent, reproduction, seasonality, trophic ecology

## Introduction

Relationships between feeding strategies and reproductive outputs have been extensively studied for a number of animal phyla in various ecosystems [1]–[5]. Where no clear trends between trophic regime and reproductive outputs could be observed in lizards [1], large variations of fecundity or reproductive outputs according to diets have been highlighted in others including birds [2], [3], sea turtles [4], annelids [5], insects [6], or crustaceans [7]–[9]. All these studies are based on ecosystems where photosynthetic primary production is the sole basis of food webs. A number of ecosystems on Earth, such as deep-sea hydrothermal vents, cold seeps and organic falls, rely on another primary

organic source: chemosynthesis [10]. In chemosynthetic ecosystems lush and dense faunal communities are supported by microorganisms using chemical energy arising from geofluids to produce their organic matter, and animals there often form intricate symbiotic associations with these chemosynthetic bacteria for nutrition [11]. From total reliance on symbiosis to bacterivory to mixotrophic to carnivorous, these particular ecosystems display a variety of diets in networks often differing strikingly from those found elsewhere [12]. In this context, these environments are natural laboratories to study relationships between reproduction and trophic regimes. However, no study has yet explored these relationships extensively in chemosynthetic ecosystems, with variations in the reproductive output among or within animal groups being mostly attributed to phylogenetic constraints [13] or variations in female body size [14]–[18].

Although most species from deep-sea chemosynthetic ecosystems exhibit continuous reproductive patterns [15], [19]–[22], seasonal cycles following variations in surface primary production have been observed in many taxa such as bythograeid vent crabs, alvinocaridid vent shrimps, and bathymodiolin mussels [17], [23]–[25]. In some groups, the surface production pattern is clearly linked to reproductive patterns in the deep. For example, some vent crab species exhibit continuous gametogenesis under the highly oligotrophic waters of the South Pacific Gyre, while others living in more productive areas north of this gyre have seasonal reproduction [20], [23]. Such examples have led to the paradigm that rhythms of sinking photosynthetic matter is the key time-synchronising cue for deep-water animals with seasonal reproduction, signalling individuals to spawn at the same period of the year.

The symbiotic and sister-species shrimps *Rimicaris exoculata* and *R. kairei* are among the most iconic hot-vent animals, with unique adaptations such as hosting symbiotic bacteria in their enlarged head cavity and the fused “dorsal eye”, a novel sensory system representing a pinnacle of adaptation to vents [26]. The entire family they belong to, Alvinocarididae, is endemic to vents and seeps with different taxa exhibiting various trophic regimes and various levels of reliance on symbiosis [27], [28], constituting an ideal case for elucidating relationships between reproduction and diet in chemosynthesis-based ecosystems. Species with different trophic regimes often co-occur on same vent fields, for example *R. exoculata* which rely on symbiosis and the mixotrophic *R. chacei*, allowing for a straight-forward comparison of species. The symbiotrophic species such as *R. exoculata* and *R. kairei* exhibit greatly inflated cephalothorax and live in large aggregates around the hot fluid flows [28]–[31], whereas mixotrophic species such as *R. chacei* [27]–[29] lacks the inflated cephalothorax and lives in small groups [32].

Attempts to understand the reproduction of *Rimicaris* shrimps have so far faced contradicting evidences. While continuous reproduction was initially suggested from examination of their reproductive tissues [16], [33] hardly any ovigerous individuals could be collected in 30 years of seagoing expeditions, despite a relatively focused and repeated sampling effort [16], [33]–[37]. Brooding females were only found in large numbers in 2014 [38], [39] and to a lesser extent in 2007 [40], around a restricted period between January and March. These females were living within dense aggregates close to vent orifices [39], refuting previous hypothesis that brooding females would migrate to vent periphery to protect their eggs from vent fluid, as observed for bythograeid crabs [23] as well as *Kiwa* squat lobsters [14]. Taken together, these recent findings suggest a seasonal reproductive cycle linked to surface primary production, as shown in vent crabs, bathymodiolin mussels and some other alvinocaridid shrimps [17], [24], [25]. However, the low primary productivity

of surface waters and the overall low export to the deep-sea compartment within the region where these shrimps have been collected [41], [42] challenges the possibility of such a link.

Here, we compare reproductive outputs of vent shrimps with contrasting diets, using two species, *R. exoculata* and *R. kairei*, with a full dependence to their chemosymbiosis and one, *R. chacei*, with a mixotrophic diet combining symbiosis, bacterivory, and scavenging. Distribution of these species in two different hemispheres (Northern Atlantic and Southern Indian Ocean) allows us to evaluate if their brooding periods are in synchrony with patterns of surface primary productivity.

## **Materials & Methods**

### **Field sampling**

Shrimps were collected from three hydrothermal vent fields (figure 1): TAG (26°08'12.12"N, 44°49'36.12"W, 3620 m depth) and Snake Pit (23°22'5.88"N 44°57'0"W, 3470 m depth) on the Mid Atlantic Ridge (MAR) between February and April in 2017 (HERMINE (doi:10.17600/17000200)) and 2018 (BICOSE2 (doi:10.17600/18000004)) for *R. exoculata* and *R. chacei*, and Kairei (25°19'10.2"S, 70°2'24"E, 2415 m depth) on the Central Indian Ridge (CIR) between February and March in 2002 and 2016, as well as in November 2009 for *R. kairei*. Shrimps were sampled using suction samplers of the human-occupied vehicle (HOV) *Nautilo* or the HOV *Shinkai 6500*. Upon recovery on-board, ovigerous females of *R. exoculata* and *R. chacei* were identified and individually sorted from the rest of the population. An additional published dataset for *Rimicaris exoculata* from January to February 2014 is also included in our analyses [39].

Ovigerous females include both brooding females and females that have just released their larvae but still retained modified pleopods, characteristic of a recent brooding status. For *R. kairei*, ovigerous females were identified and sorted from the rest of the population in the laboratory after the cruise. Egg stages in broods were identified on-board during the BICOSE 2 expedition before being fixed in 10% neutral buffered formalin for 24h and then rinsed and stored in 80% EtOH. For other expeditions, ovigerous females were fixed and stored in 10% formalin on-board and identification of egg stages was conducted in shore-based laboratory.

### **Shrimps and Eggs Measurements**

Carapace length (CL) of each female was measured with Vernier callipers from the posterior margin of the ocular shield (or eye socket) to mid-point of the posterior margin of the carapace, with an estimated precision of 0.1 mm. For each brood, total number of eggs was manually counted. Ten eggs were selected randomly to measure maximum and minimum diameters. Volume of embryos was estimated following the same method as [39], considering a spheroid volume  $v = (4/3) \cdot \pi \cdot r_1 \cdot r_2^2$ , where  $r_1$  and  $r_2$  are half of maximum and minimum axis of each egg, respectively. Eggs in broods were classified in three developmental stages (early, mid, and late), following the classification used in [38]. Some ovigerous females harboured damaged or aborted broods and were thus discarded from our fecundity analysis. Furthermore, we also compiled data for the presence of ovigerous female shrimps from the literature and using dive videos from cruises over the last 14 years, in order to assess the reproductive seasonality. Proportions of ovigerous females within samples were calculated against the number of sexually mature females (See supplementary material).

## **Statistical analysis**

Brooding females were grouped according to sampling year, species and vent field. Visual examination of our dataset and Shapiro-Wilk normality tests revealed that size, egg number, and egg volume of *Rimicaris* brooding females deviated from normal distribution. Therefore, non-parametric tests were used for intergroup comparison, with a Kruskal-Wallis test followed by post-hoc Dunn tests when three or more groups were compared. Spearman rank-order correlation were used to assess relationship between  $\log_e$ -transformed realized fecundity and  $\log_e$ -transformed carapace length of the different shrimp groups. Egg stage proportions between groups were compared using  $\chi^2$  test with Yate's correction. All analyses were performed in R v. 4.0.3 [43].

## **Results**

### **Interannual variation of *R. exoculata* reproduction**

Realized fecundity of *Rimicaris exoculata* correlated positively with carapace length in both 2014 (Spearman correlation  $r= 0.67$ ,  $p < 0.0001$ ) and 2018 (Spearman correlation  $r= 0.73$ ,  $p < 0.0001$ ) (figure 2a). Moreover, slopes of the relationship between  $\log_e$ -transformed realized fecundity and  $\log_e$ -transformed carapace length did not differ significantly between these two sampling years ( $F= 1.175$ ,  $p = 0.28$ ) or between TAG and Snake Pit in 2018 ( $F= 0.004$ ,  $p= 0.95$ ). Although no correlation was found in 2017 (Spearman correlation  $r= 0.38$ ,  $p= 0.16$ ), probably due to the lower sampling effort, realized fecundity in 2017 still fell within the range of the other sampling years (figure 2a).

Overall, size-specific fecundity ranged from 19 to 95 eggs  $\text{mm}^{-1}$  in 2014, from 15 to 80 eggs  $\text{mm}^{-1}$  in 2017 and from 10 to 134 eggs  $\text{mm}^{-1}$  in 2018 (figure 2b). Limited differences in size-specific fecundities were observed between different sampling years (Kruskal-Wallis,  $H= 65.025$   $p < 0.05$ ) with significant variations between 2014 and 2018 at TAG only (2014:  $37.3 \pm 11.4$ ; 2018:  $49.4 \pm 12.9$ ; Dunn's Multiple Comparison Test,  $p < 0.05$ ). Differences in size-specific fecundity were also observed between the two vent fields both in 2014 and in 2018, (Dunn's Multiple Comparison Tests,  $p < 0.05$ ). Carapace length of brooding females from TAG were indeed larger in 2018 than in 2014 (Dunn's Multiple Comparison Test,  $p < 0.05$ ) suggesting that size-specific fecundity increase was attributable to this larger body size in 2018. Similarly, carapace lengths of brooding females were always larger at Snake Pit compared to TAG both in 2014 and in 2018 (Dunn's Multiple Comparison Tests,  $p < 0.05$ ).

Variations were also observed in egg volumes between different sampling years (Kruskal-Wallis,  $H= 87.434$ ,  $p < 0.05$ ) (figure 2c). Larger egg volumes were found in 2014 compared to other years of sampling for both vent fields and across all developmental stages (Dunn's Multiple Comparison Tests,  $p < 0.05$ ). We note that the 2014 dataset was produced separately in a previous study (See supplementary material) and may be biased by an observer effect.

### **Variations in reproductive patterns between *Rimicaris* species**

Like *R. exoculata*, the realized fecundity of *R. kairei* and *R. chacei* correlated positively with carapace length (Spearman's correlation: *R. kairei*:  $r= 0.40$ ,  $p= 0.0044$ ; *R. chacei*:  $r= 0.70$ ,  $p= 0.00066$ ) (figure 3a). Moreover, the slopes of the relationship between  $\log_e$ -transformed realized fecundity and  $\log_e$ -transformed carapace length did not significantly differ between *R. exoculata* and its sister species

*R. kairei* ( $F= 1.6168, p= 0.2054$ ). However, they significantly differed between *R. exoculata* and its co-occurring congener *R. chacei* ( $F= 6.6376, p < 0.05$ ).

Overall, size-specific fecundity ranged from 23 to 112 eggs  $\text{mm}^{-1}$  for *R. kairei* and from 26 to 255 eggs  $\text{mm}^{-1}$  for *R. chacei* (figure 3b). Large differences in size-specific fecundity were observed between *R. exoculata* and other *Rimicaris* species (Kruskal-Wallis  $H= 68.836, p < 0.05$ ). Size-specific fecundity of *R. chacei* was always significantly greater compared to *R. exoculata* both at TAG (*R. exoculata*:  $49 \pm 13$ ; *R. chacei*:  $129 \pm 59$ ; Dunn's Multiple Comparison Test,  $p < 0.05$ ) and Snake Pit (*R. exoculata*:  $69 \pm 31$ ; *R. chacei*:  $148 \pm 87$ ; Dunn's Multiple Comparison Test,  $p < 0.05$ ). These differences were independent of size variations between the two species with *R. chacei* brooding females being either of similar size at TAG (Dunn's Multiple Comparison Test,  $p > 0.05$ ) or even smaller at Snake Pit (Dunn's Multiple Comparison Test,  $p < 0.05$ ). Less differences in size-specific fecundities were observed between *R. exoculata* and *R. kairei* with only a higher size-specific fecundity for *R. kairei* ( $72 \pm 20$ ) from Kairei compared to *R. exoculata* from TAG ( $49 \pm 13$ ; Dunn's Multiple Comparison Test,  $p < 0.05$ ). Such variations may be linked to differences in body size of brooding females, as *R. exoculata* from TAG were smaller in average than *R. kairei* from Kairei (Dunn's Multiple Comparison Test,  $p < 0.05$ ).

Large differences were also observed in egg volumes between *R. exoculata* and other *Rimicaris* species (Kruskal-Wallis  $H= 49.80, p < 0.05$ ) (figure 3c,d). Thus, egg volumes of *R. chacei* were significantly smaller than *R. exoculata* at any stage across all vents (Dunn's Multiple Comparison Test,  $p < 0.05$ ) (figure 3c). In contrast, differences in egg volumes were more limited between *R. exoculata* and *R. kairei* with significantly larger eggs for *R. kairei* from Kairei compared to *R. exoculata* from TAG for mid stages only (figure 3d). Surprisingly, we did not find gradual increase of egg volumes between successive developmental stages of *R. chacei* as was observed in the two other *Rimicaris* species, either at TAG (Kruskal-Wallis  $H= 2.57, p > 0.05$ ) or at Snake Pit (Kruskal-Wallis  $H= 0.61, p > 0.05$ ). Of note, we did not observe ready-to-hatch or hatched egg broods in *R. chacei* as was seen in the other shrimps.

### **Temporal variations in the presence of *Rimicaris* ovigerous females**

A large number of ovigerous females of *R. exoculata* and *R. chacei* were retrieved in February 2018 at both MAR vent fields (figure 4a). Indeed, 55.4% and 18.2% of sexually mature *R. exoculata* females collected from TAG and Snake Pit respectively, were ovigerous females, while these account for 70.6% and 32.3% of sexually mature *R. chacei* females from TAG and Snake Pit, respectively. Ovigerous females of *R. exoculata* were also present between late March and April 2017 although in a relatively lower proportion, constituting 25.7% and 4% of sexually mature females collected at TAG and Snake Pit, respectively (figure 4a). The majority of *R. exoculata* ovigerous females were collected in dense aggregates close to vent orifices with only two ovigerous females taken outside these assemblages. On the other hand, ovigerous females of *R. chacei* were collected either in hidden aggregates where large populations of their adults have been retrieved [32] or within dense aggregates of *R. exoculata*. As highlighted previously [39], ovigerous females of *R. exoculata* were almost absent from samples collected outside this period of the year – i.e., January to April – despite more than 30 years of sampling efforts along the MAR (figure 4a). Similarly, ovigerous females of *R. chacei* were almost absent from other sampling reports with only two ovigerous females collected in January 2014 at Snake Pit and one in June 1994 at Lucky Strike (figure 4b)

Large numbers of ovigerous *R. kairei* were also retrieved in February 2002 and 2016 at Kairei on the CIR (figure 4c), constituting respectively 16.3% and 19.2% of sexually mature females collected

at this vent field. Conversely, ovigerous females were completely absent from samples collected in November 2009 (figure 4c). Like *R. exoculata*, all of these ovigerous females were collected in dense aggregates of shrimps next to hot fluid emissions.

## **Discussion**

### **Distinct reproductive strategies in *Rimicaris* shrimps**

*Rimicaris exoculata* and *Rimicaris chacei* populations exhibit distinct reproductive patterns unlikely to simply result from differences in mean body sizes. *Rimicaris kairei* presents reproductive patterns similar to its sister species *R. exoculata*, in terms of size-specific fecundity or mean egg size. Our results indicate that the two lineages (*R. exoculata* and *R. kairei*, vs *R. chacei*) are situated at two ends of the trade-off between size-specific fecundity and egg sizes currently observed within alvinocaridids [16]–[18], [44]. On one hand, *R. chacei* brooding females display one of the highest size-specific fecundity and one of the smallest mean egg sizes among alvinocaridids, whereas *R. exoculata*/*R. kairei* brooding females present a rather low size-specific fecundity and a large mean egg size for this family.

These variations mirror differences observed in benthic post-settlement stages of these two lineages, with significantly smaller body size for settled juveniles, as well as much larger relative proportions of juveniles in populations of *R. chacei* [29], [32]. Higher egg numbers per brood in *R. chacei* might thus contribute to its high supply of settlers despite an apparently lower breeding population size than *R. exoculata* in northern MAR vent fields. Previous work has hypothesized distinct larval life histories between these two species based on distinct stable isotope ratios [29]. Given we did not observe ready-to-hatch or hatched egg broods for *R. chacei*, it is unclear if observed differences in mean egg size between the two species would ultimately lead to distinct larval sizes at hatching. No size variation was found among first zoeal larval stages of four phylogenetically distinct alvinocaridids [45]. Although *R. chacei* zoea have not been observed so far, it is unlikely that hatching size difference only, if it exists, explains the large size difference at recruitment between *R. exoculata* and *R. chacei*, which also probably results from differences in their pelagic lives during their dispersal phase.

The sister species of *R. chacei* is *R. hybisae* from vents on the Mid Cayman Spreading Centre, but interestingly size-specific fecundity of *R. hybisae* is more similar to *R. exoculata*/*R. kairei* rather than *R. chacei* [18]. *Rimicaris hybisae* share with *R. exoculata*/*R. kairei* both a comparable ecological context, living in dense aggregates close to vent fluids emissions, and a comparable gross morphology, with an enlarged cephalothorax [26], characters lacking in *R. chacei*. These are linked to distinct feeding strategies between the two groups of shrimps, with a mixotrophic diet for *R. chacei* [27]–[29] and dependency on chemosynthetic symbionts for others including *R. hybisae* [28]–[31]. Variations in fecundity according to feeding strategies have been widely recognized in marine animals such as between carnivorous and herbivorous sea turtles [4], among seabirds with different feeding habits [2] or between *Capitella* worms fed with different food sources in laboratory [5]. Reduced or increased reproductive outputs have also been observed experimentally in several shrimp species according to their diets [7]–[9]. This suggests differences in fecundity for these shrimps are linked to their feeding ecology, rather than being constrained by their phylogeny.

Despite these variations in average egg number, mean egg sizes of *R. hybisae* and *R. chacei* were in contrary comparable with similar maximum and minimum egg diameters [18]. As *R. exoculata* and *R. kairei* also exhibit similar egg volumes, phylogenetic constraints are possibly exerted on mean egg sizes for these shrimps. Further work on more alvinocaridid shrimps with different feeding strategies should help to elucidate these questions.

### **The intriguing reproductive cycles of *Rimicaris* shrimps**

We report here a much-increased presence of ovigerous *R. exoculata* in February 2018 and to a lower extent in late March-April 2017, compared to other year periods. Combined with previous data from the literature (summarized in figure 4A), these results support the existence of a brooding period for *R. exoculata* mostly during boreal winter, starting in January/February and ending around March/April. Moreover, we did not observe any variability in reproductive features of *R. exoculata*, either in terms of fecundity or proportions of reproductive females, between different sampling years – indicating a relative inter-annual stability of these traits (figure 2). Large proportions of *R. chacei* ovigerous females were also retrieved in February 2018 at the two vent fields, in contrast to historical sampling at other periods along the MAR (figure 4B). Hence, a similar periodicity in reproduction likely exists for both *Rimicaris* shrimps at MAR. Ovigerous *R. chacei* females were however scarce in other expeditions both during and outside this period (figure 4B), which could be due to difficulties in sampling this rather fast swimming species, thus preventing so far, a full appreciation of its reproductive activity.

We also found large proportions of *Rimicaris kairei* ovigerous females during austral summer in February 2002 and 2016, while they were absent from collections in August 2000 and November 2009 (figure 4c). Reproduction in *R. kairei* thus appears to follow the same timing as *R. exoculata* and *R. chacei*. Such pattern was unexpected given their distribution in different hemispheres, at vent fields with opposite latitudes (figure 1). Reproductive periodicity in deep-sea animals has often been related to seasonal variations in surface photosynthetic production [26]-[28], and *Rimicaris* shrimps from the two hemispheres are expected to experience opposite trends in terms of surface primary production along the year [41], [42], driving opposite reproductive timing. Although our dataset for *R. kairei* is more limited than for *R. exoculata*, these sister species thus appear to share same periodic brooding cycle, regardless of local seasonal variations in surface photosynthetic productivity. *Rimicaris* species studied here provide a first example of reproductive periodicity in deep-sea ecosystems apparently unlinked to seasonal variations of photosynthetic materials from the surface.

Besides light and food supply, temperature has also been recognized as an important external time-giving cue in marine organisms [46]. Compared to most of the deep sea where temperature is relatively constant within regions, hydrothermal vents constitute heat anomalies with steep and unpredictable gradients at small spatial scales, even within a same animal aggregation [47]. Thermal variability at an annual scale could perhaps serve as a time-synchronising cue for these *Rimicaris* shrimps. So far, thermal variations in these ecosystems at a year-round scale remain poorly documented. However, long-term observatories deployed on two vent fields from the northern hemisphere have reported clear tidal influence, although temperatures are relatively stable throughout the year [48], [49]. Recently, it was revealed that bathymodiolin mussels inhabiting vents on the MAR retain and express circadian clock genes following tidal cycles which may be mediated by either tidal stimulus or internal clock [50]. Possibly, *Rimicaris* shrimp species studied herein also use a set of biological clocks to time their reproductive activity. Though, not all alvinocaridid shrimps seem

to exhibit periodicity in their reproductive patterns, despite a gametogenesis phase being strongly constrained phylogenetically [16]. For example, regular sampling of *Mirocaris fortunata* yielded ovigerous females throughout the year [16], [51], [52] and similarly in *Rimicaris variabilis* [53], [54]. Other alvinocaridid shrimps may also indeed follow seasonality in surface production, like *Alvinocaris stactophila* with a brooding period between November and March [17], and inhabiting relatively shallow cold seeps under highly productive coastal waters. Hence, several synchronizing factors may co-exist in vents and other deep-sea ecosystems, even within the same family of animals. For example, our results here demonstrate that *R. exoculata* and *R. kairei* exhibit seasonality decoupled from surface seasonality, but as the study areas have relatively low surface primary productivity and export of particulate organic carbon (POC) to the deep [41], [42] it is also possible that a higher POC export may begin to interfere with this pattern. Taken together – primary surface production may be the key synchronising cue for some deep-sea species as demonstrated in bathymodiolin mussels and vent crabs [24], [25], but our results underscore that reproductive cycles and seasonality at the deep is not as simple as it was thought to be.

A thorough understanding of reproductive ecology of the dominant species shaping the ecosystem is key to assessing the resilience of deep-sea ecosystems, but little has been done so far even for emblematic taxa like *Rimicaris*. With deep-sea mining for massive sulphides and other resources being imminent [55], the habitat of these amazing animals that can live nowhere else is being threatened. Elucidating the ecology of these inhabitants of the deep is now more important than ever, and our data exemplifies the importance of time-series studies. Research expeditions in a particular region tend to be conducted in similar timings of the year due to seasonal variations in sea and weather conditions, but our results show that communities need to be revisited at different times of the year.

## **Ethics**

The animals used in this study were invertebrate carideans collected in the French contract area for the exploration of polymetallic sulphur deposits (Mid-Atlantic Ridge) or International Waters (Central Indian Ridge). Each individual was immediately preserved in ethanol after recovery and no live experiments were carried out.

## **Author's contributions**

P.M. collected and sorted specimens in 2018 on the MAR, carried out the identification and measurement of specimens from all sampling cruises, lead the data analysis, participated in the conception and design of the study and drafted the manuscript; C.C. carried out the collection of specimens in 2016 on the CIR and helped draft the manuscript; H.K.W. carried out the collection of specimens in 2009 and critically revised the manuscript; M-A.C-B. collected specimens in 2017 on the MAR, coordinated the study and critically revised the manuscript; F.P. collected and sorted specimens in 2017 conceived and designed the study, coordinated the study and helped draft the manuscript. All authors gave final approval for publication and agreed to be held accountable for the work performed therein.



## **Competing interests**

The authors declare they have no competing interests.

## **Funding**

This work was supported by the Ifremer REMIMA program and the Region Bretagne ARED funding. C.C. and H.K.W. were supported by a Japan Society for the Promotion of Science (JSPS) Grant-in-Aid for Scientific Research, grant code 18K06401. Travel of the first author from Ifremer to JAMSTEC was funded by Ifremer international mobility grant for PhD students.

## **Acknowledgements**

The authors thank the captains and crews of R/V *Pourquoi pas?* and HOV *Nautille* submersible team for their efficiency, as well as the chief scientists and scientific parties of HERMINE (chief scientist: Yves Fouquet; <http://dx.doi.org/10.17600/17000200>) and BICOSE 2 cruise (chief scientist: Marie-Anne Cambon-Bonavita; <http://dx.doi.org/10.17600/18000004>). Further thanks also go to the captains and crews of R/V *Yokosuka*, and the HOV *Shinkai 6500* submersible team for their continuous support of the scientific activity at sea, as well as the chief scientists and scientific parties during the research cruises YK01-15 (chief scientist: Ken Takai), YK09-13 (chief scientists: Kentaro Nakamura, Satoshi Nakagawa) and YK16-E02 (chief scientist: Ken Takai).

## Figure Captions

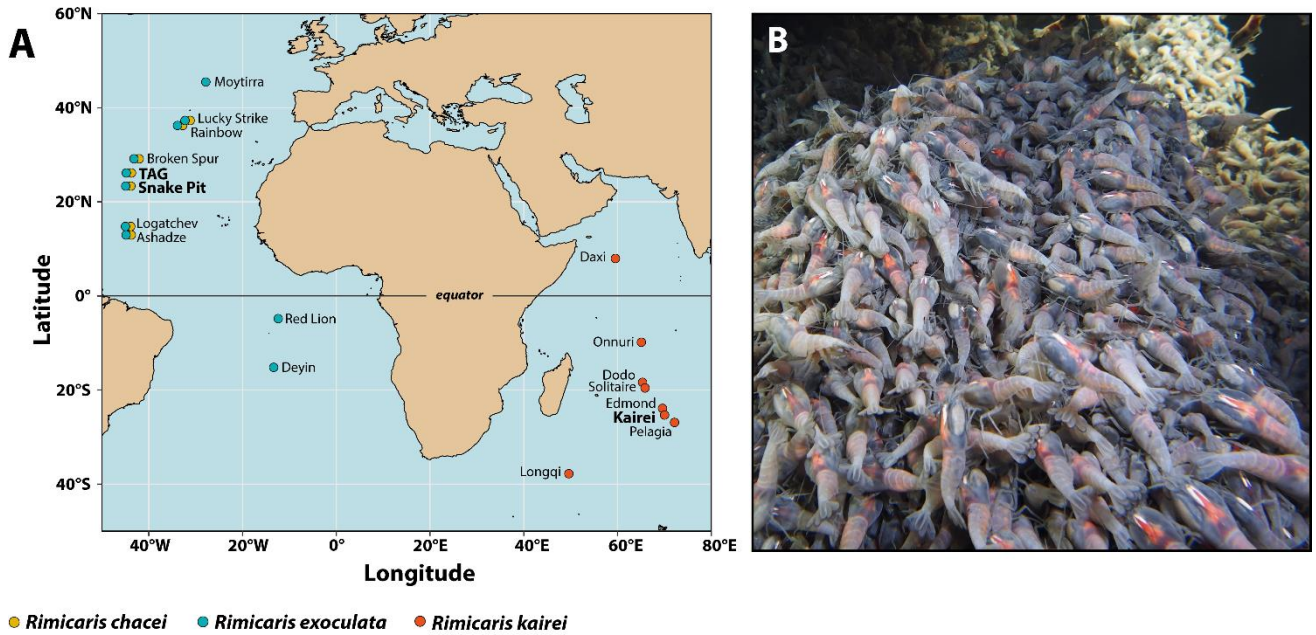

**Figure 1.** Context of the study. **a.** Current geographic distribution of the three *Rimicaris* species studied. **b.** Dense aggregations of *R. kairei* shrimps in February 2016 at the Kairei hydrothermal vent field.

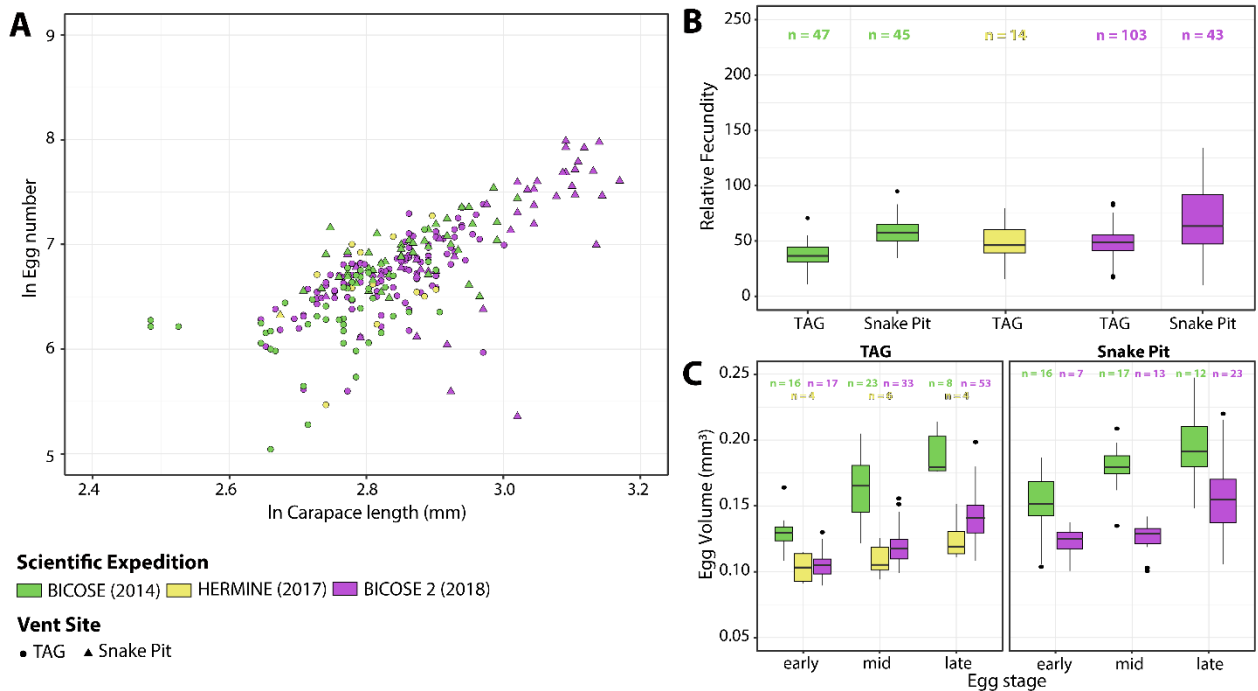

**Figure 2.** Interannual comparison of reproductive features of *Rimicaris exoculata* collected between 2014 and 2018. **n:** number of individuals for each condition. **a.** Variation of  $\log_e$ -transformed minimum realized fecundity with  $\log_e$ -transformed carapace length. **b.** Fecundity corrected for body size (carapace length) **c.** Egg volumes at different developmental stages.

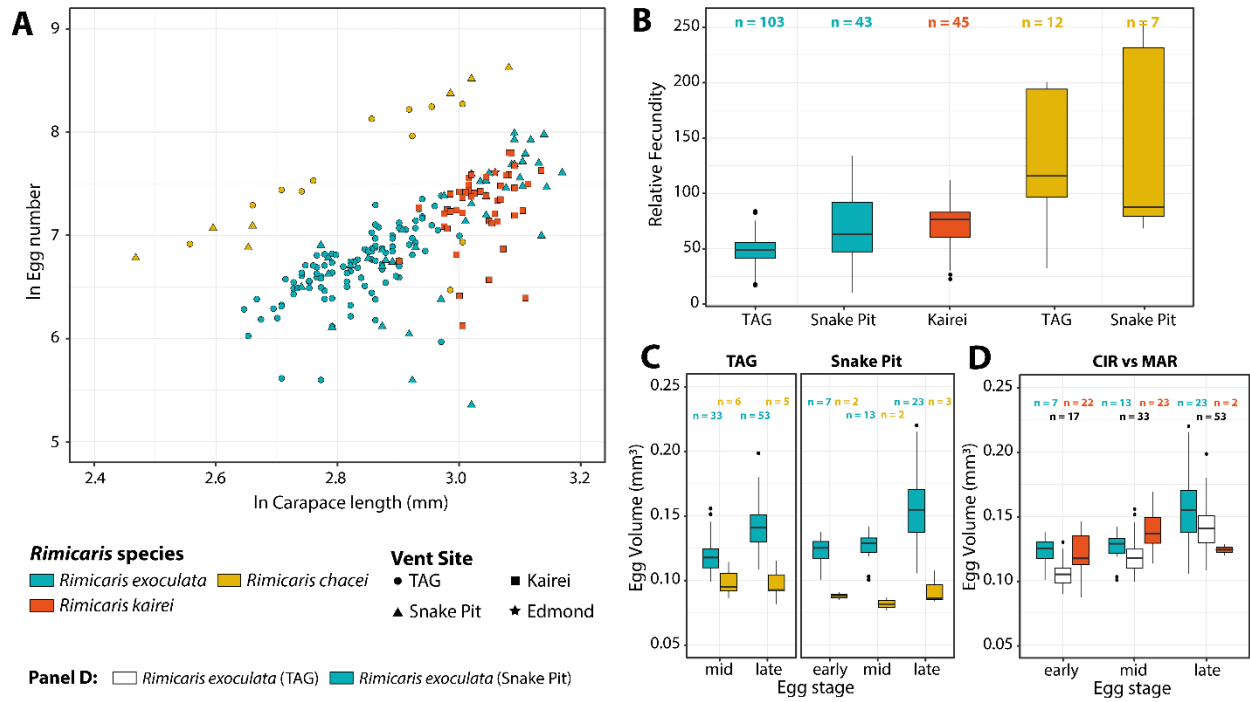

**Figure 3.** Comparison of reproductive features between *Rimicaris* species from the MAR and the CIR. **n:** number of individuals for each condition. **a.** Variation of  $\log_e$ -transformed minimum realized fecundity with  $\log_e$ -transformed carapace length. **b.** Fecundity corrected for body size (carapace length). **c.** Egg volumes at different developmental stages of *Rimicaris* shrimps from the MAR. **d.** Egg volumes at different developmental stages of *R. exoculata* and *R. kairei*.

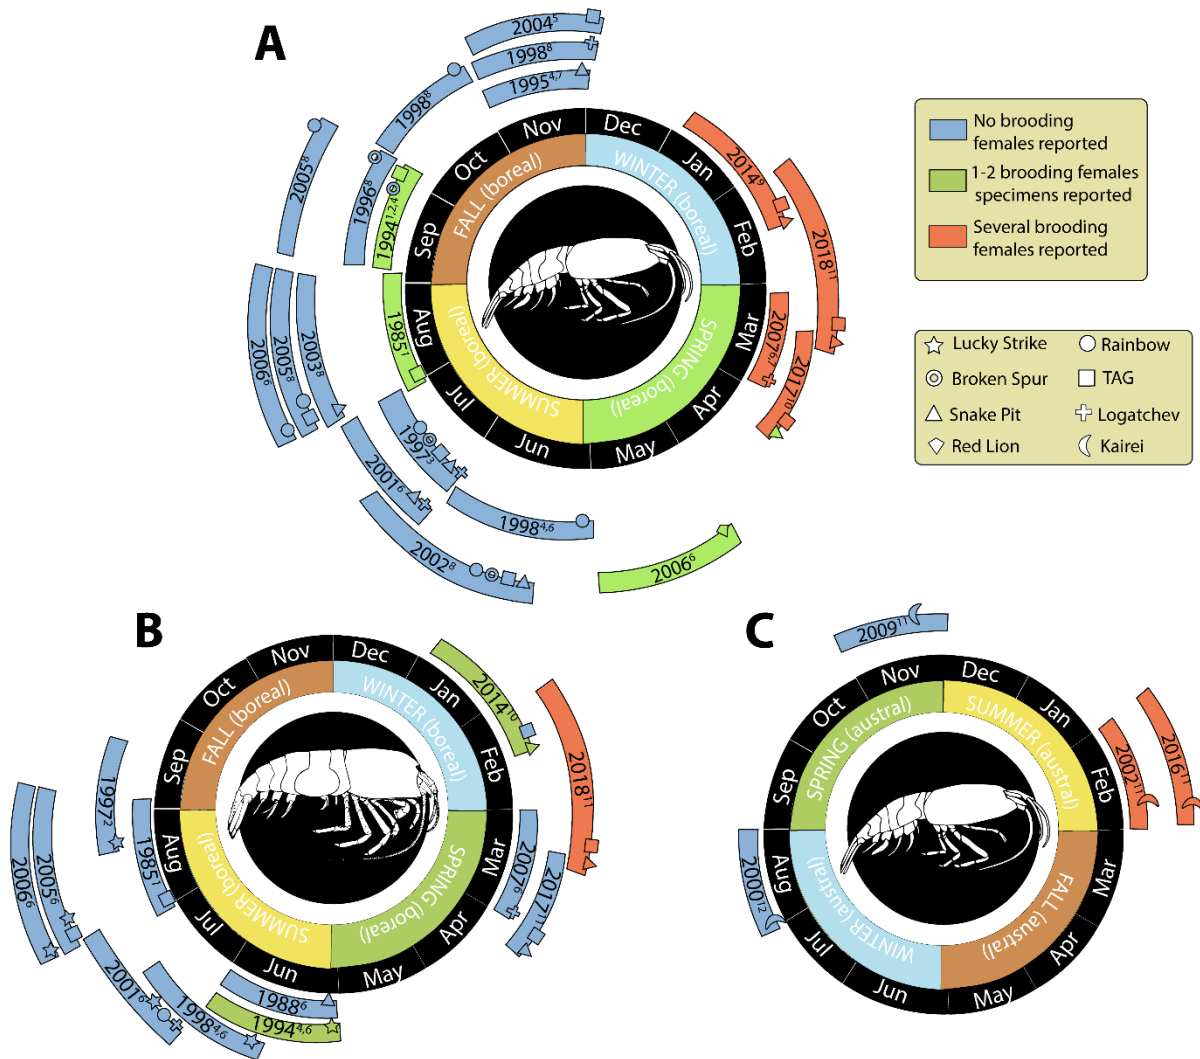

<sup>1</sup>Williams and Rona (1986), <sup>2</sup>Vereshchaka (1997), <sup>3</sup>Shank et al. (1998), <sup>4</sup>Ramirez-Llodra et al. (2000), <sup>5</sup>Copley et al. (2007), <sup>6</sup>Komai and Segonzac (2008), <sup>7</sup>Guri et al. (2012)  
<sup>8</sup>Lunina and Vereshchaka (2014), <sup>9</sup>Methou et al. (2019), Hernández-Avila et al. (2021), <sup>10</sup>Cruise Report BICOSE (2014), <sup>11</sup>This work, <sup>12</sup>Watabe & Hashimoto (2002)

**Figure 4.** Diagrams summarizing occurrence of reproductive stages of the studied *Rimicaris* shrimp species over different samplings realized between 1985 and 2018 according to the year period **a.** for *R. exoculata*. **b.** for *R. chacei*. **c.** for *R. kairei*.

## References

- [1] S. Meiri, J. H. Brown, and R. M. Sibly, "The ecology of lizard reproductive output," *Glob. Ecol. Biogeogr.*, vol. 21, no. 5, pp. 592–602, 2012, doi: 10.1111/j.1466-8238.2011.00700.x.
- [2] R. Pierotti and C. a Annett, "Diet and Reproductive Output in Seabirds," *Bioscience*, vol. 40, no. 8, pp. 568–574, Sep. 1990, doi: 10.2307/1311297.
- [3] R. M. Sibly, C. C. Witt, N. A. Wright, C. Venditti, W. Jetz, and J. H. Brown, "Energetics, lifestyle, and reproduction in birds," *Proc. Natl. Acad. Sci. U. S. A.*, vol. 109, no. 27, pp. 10937–10941, 2012, doi: 10.1073/pnas.1206512109.
- [4] A. C. Broderick, F. Glen, B. J. Godley, and G. C. Hays, "Variation in reproductive output of marine turtles," *J. Exp. Mar. Bio. Ecol.*, vol. 288, no. 1, pp. 95–109, 2003, doi: 10.1016/S0022-0981(03)00003-0.
- [5] P. Y. Qian and F. S. Chia, "Fecundity and egg size are mediated by food quality in the polychaete worm *Capitella* sp.," *J. Exp. Mar. Bio. Ecol.*, vol. 148, no. 1, pp. 11–25, 1991, doi: 10.1016/0022-0981(91)90143-K.
- [6] Y. Gutiérrez, M. Fresch, D. Ott, J. Brockmeyer, and C. Scherber, "Diet composition and social environment determine food consumption, phenotype and fecundity in an omnivorous insect," *R. Soc. Open Sci.*, vol. 7, no. 4, 2020, doi: 10.1098/rsos.200100.
- [7] A. S. e Almeida, S. de Paiva Barros-Alves, G. L. Hirose, and D. F. R. Alves, "Reproductive output of the ornamental shrimp *Lysmata vittata* (Stimpson, 1860) (Decapoda: Caridea) in wild populations and under different maturation diets," *Invertebr. Reprod. Dev.*, vol. 62, no. 4, pp. 257–267, 2018, doi: 10.1080/07924259.2018.1509903.
- [8] V. Tziouveli, M. Hall, and G. Smith, "The Effect of Maturation Diets on the Reproductive Output of the White-striped Cleaner Shrimp, *Lysmata amboinensis*," *J. World Aquac. Soc.*, vol. 42, no. 1, pp. 56–65, 2011, doi: 10.1111/j.1749-7345.2010.00443.x.
- [9] J. Lin and H. Shi, "Effect of Broodstock Diet on Reproductive Performance of the Golden Banded Coral Shrimp *Stenopus scutellatus*," *J. World Aquac. Soc.*, vol. 33, no. 3, pp. 383–386, 2002, doi: 10.1111/j.1749-7345.2002.tb00515.x.
- [10] C. R. German *et al.*, "Deep-water chemosynthetic ecosystem research during the census of marine life decade and beyond: A proposed deep-ocean road map," *PLoS One*, vol. 6, no. 8, 2011, doi: 10.1371/journal.pone.0023259.
- [11] N. Dubilier, C. Bergin, and C. Lott, "Symbiotic diversity in marine animals: the art of harnessing chemosynthesis," *Nat. Rev. Microbiol.*, vol. 6, no. 10, pp. 725–40, 2008, doi: 10.1038/nrmicro1992.
- [12] B. Govenar, "Energy Transfer Through Food Webs at Hydrothermal Vents: Linking the Lithosphere to the Biosphere," *Oceanography*, vol. 25, no. 1, pp. 246–255, 2012, doi: 10.5670/oceanog.2012.23.
- [13] P. A. Tyler and C. M. Young, "Reproduction and dispersal at vents and cold seeps," *J. Mar. Biol. Assoc. United Kingdom*, vol. 79, pp. 193–208, 1999, doi: 10.1017/S0025315499000235.
- [14] L. Marsh, J. T. Copley, P. A. Tyler, and S. Thatje, "In hot and cold water: Differential life-history traits are key to success in contrasting thermal deep-sea environments," *J. Anim. Ecol.*, vol. 84, no. 4, pp. 898–913, 2015, doi: 10.1111/1365-2656.12337.
- [15] J. Marticorena, M. Matabos, J. Sarrazin, and E. Ramirez-Llodra, "Contrasting reproductive

- biology of two hydrothermal gastropods from the Mid-Atlantic Ridge : implications for resilience of vent communities,” *Mar. Biol.*, vol. 167, no. 109, pp. 1–19, 2020, doi: 10.1007/s00227-020-03721-x.
- [16] E. Ramirez-Llodra, P. A. Tyler, and J. T. P. Copley, “Reproductive biology of three caridean shrimp, *Rimicaris exoculata*, *Chorocaris chacei* and *Mirocaris fortunata*,” *J. Mar. Biol. Assoc. United Kingdom*, vol. 80, no. 3, pp. 473–484, 2000, doi: 10.1017/S0025315400002174.
- [17] J. T. P. Copley and C. M. Young, “Seasonality and zonation in the reproductive biology and population structure of the shrimp *Alvinocaris stactophila* (Caridea: Alvinocarididae) at a Louisiana Slope cold seep,” *Mar. Ecol. Prog. Ser.*, vol. 315, no. June, pp. 199–209, Jun. 2006, doi: 10.3354/meps315199.
- [18] V. Nye, J. T. P. Copley, and P. A. Tyler, “Spatial Variation in the Population Structure and Reproductive Biology of *Rimicaris hybisae* (Caridea: Alvinocarididae) at Hydrothermal Vents on the Mid-Cayman Spreading Centre,” *PLoS One*, vol. 8, no. 3, 2013, doi: 10.1371/journal.pone.0060319.
- [19] B. Faure, P. Chevaldonné, F. Pradillon, E. Thiébaud, and D. Jollivet, “Spatial and temporal dynamics of reproduction and settlement in the Pompeii worm *Alvinella pompejana* (Polychaeta: Alvinellidae),” *Mar. Ecol. Prog. Ser.*, vol. 348, pp. 197–211, 2007, doi: 10.3354/meps07021.
- [20] A. Hilário, S. Vilar, M. R. Cunha, and P. Tyler, “Reproductive aspects of two bythograeid crab species from hydrothermal vents in the Pacific-Antarctic Ridge,” *Mar. Ecol. Prog. Ser.*, vol. 378, no. March, pp. 153–160, 2009, doi: 10.3354/meps07858.
- [21] P. A. Tyler *et al.*, “Reproduction of Gastropods from Vents on the East Pacific Rise and the Mid-Atlantic Ridge,” *J. Shellfish Res.*, vol. 27, no. 1, pp. 107–118, 2008, doi: 10.2983/0730-8000(2008)27[107:rogfvo]2.0.co;2.
- [22] D. Jollivet *et al.*, “Reproductive biology, sexual dimorphism, and population structure of the deep sea hydrothermal vent scale-worm, *Branchiopolynoe seepensis* ( Polychaeta : Polynoidae ),” *J. Mar. Biol. Assoc. United Kingdom*, vol. 80, pp. 55–68, 2000, doi: 10.1017/S0025315499001563.
- [23] G. M. Perovich, C. E. Epifanio, A. I. Dittel, and P. A. Tyler, “Spatial and temporal patterns in development of eggs in the vent crab *Bythograea thermydron*,” *Mar. Ecol. Prog. Ser.*, vol. 251, pp. 211–220, 2003, doi: 10.3354/meps251211.
- [24] D. R. Dixon *et al.*, “Evidence of seasonal reproduction in the Atlantic vent mussel *Bathymodiolus azoricus*, and an apparent link with the timing of photosynthetic primary production,” *J. Mar. Biol. Assoc. United Kingdom*, vol. 86, no. 6, pp. 1363–1371, 2006, doi: 10.1017/S0025315406014391.
- [25] P. A. Tyler, C. M. Young, E. Dolan, S. M. Arellano, and S. D. Brooke, “Gametogenic periodicity in the chemosynthetic cold-seep mussel “*Bathymodiolus*” *childressi*,” *Mar. Biol.*, vol. 150, pp. 829–840, 2007, doi: 10.1007/s00227-006-0362-9.
- [26] M. Zbinden and M. Cambon-Bonavita, “Biology and ecology of *Rimicaris exoculata*, a symbiotic shrimp from deep-sea hydrothermal vents,” *Mar. Ecol. Prog. Ser.*, vol. 652, pp. 187–222, 2020, doi: 10.3354/meps13467.
- [27] V. Apremont *et al.*, “Gill chamber and gut microbial communities of the hydrothermal shrimp *Rimicaris chacei* Williams and Rona 1986: A possible symbiosis,” *PLoS One*, vol. 13, no. 11, p. e0206084, Nov. 2018, doi: 10.1371/journal.pone.0206084.

- [28] A. V. Gebruk, E. C. Southward, H. Kennedy, and A. J. Southward, "Food sources, behaviour, and distribution of hydrothermal vent shrimps at the Mid-Atlantic Ridge," *J. Mar. Biol. Assoc. United Kingdom*, vol. 80, no. 3, pp. 485–499, 2000, doi: 10.1017/S0025315400002186.
- [29] P. Methou, L. N. Michel, M. Segonzac, M.-A. Cambon-Bonavita, and F. Pradillon, "Integrative taxonomy revisits the ontogeny and trophic niches of *Rimicaris* vent shrimps," *R. Soc. Open Sci.*, vol. 7, no. 7, p. 200837, Jul. 2020, doi: 10.1098/rsos.200837.
- [30] C. L. Van Dover, "Trophic relationships among invertebrates at the Kairei hydrothermal vent field (Central Indian Ridge)," *Mar. Biol.*, vol. 141, no. 4, pp. 761–772, 2002, doi: 10.1007/s00227-002-0865-y.
- [31] K. Streit, S. A. Bennett, C. L. Van Dover, and M. Coleman, "Sources of organic carbon for *Rimicaris hybisae*: Tracing individual fatty acids at two hydrothermal vent fields in the Mid-Cayman rise," *Deep. Res. Part I Oceanogr. Res. Pap.*, vol. 100, pp. 13–20, 2015, doi: 10.1016/j.dsr.2015.02.003.
- [32] P. Methou, I. Hernández-Ávila, C. Cathalot, M.-A. Cambon-Bonavita, and F. Pradillon, "Population structure and environmental niches of *Rimicaris* shrimps from the Mid Atlantic Ridge," *bioRxiv*, 2021, doi: 10.1101/2021.06.27.450074.
- [33] J. T. P. Copley, P. B. K. Jorgensen, and R. A. Sohn, "Assessment of decadal-scale ecological change at a deep Mid-Atlantic hydrothermal vent and reproductive time-series in the shrimp *Rimicaris exoculata*," *J. Mar. Biol. Assoc.*, vol. 87, pp. 859–867, 2007, doi: 10.1017/S0025315407056512.
- [34] A. B. Williams and P. A. Rona, "Two New Caridean Shrimps from a Hydrothermal Field on the Mid Atlantic Ridge," *J. Crustac. Biol.*, vol. 6, no. 3, pp. 446–462, 1986, doi: 10.1163/193724086X00299.
- [35] A. L. Vereshchaka, "Comparative morphological studies on four populations of the shrimp *Rimicaris exoculata* from the Mid-Atlantic Ridge," *Deep. Res. Part I Oceanogr. Res. Pap.*, vol. 44, no. 11, pp. 1905–1921, 1997, doi: 10.1016/S0967-0637(97)00031-9.
- [36] T. M. Shank, R. a Lutz, and R. C. Vrijenhoek, "Molecular systematics of shrimp (Decapoda: Bresiliidae) from deep-sea hydrothermal vents, I: Enigmatic 'small orange' shrimp from the Mid-Atlantic Ridge are juvenile *Rimicaris exoculata*," *Mol. Mar. Biol. Biotechnol.*, vol. 7, no. 2, pp. 88–96, 1998.
- [37] T. Komai and M. Segonzac, "Taxonomic Review of the Hydrothermal Vent Shrimp Genera *Rimicaris* Williams & Rona and *Chorocaris* Martin & Hessler (Crustacea: Decapoda: Caridea: Alvinocarididae)," *J. Shellfish Res.*, vol. 27, no. 1, pp. 21–41, 2008, doi: 10.2983/0730-8000(2008)27[21:TROTHV]2.0.CO;2.
- [38] P. Methou *et al.*, "Is It First the Egg or the Shrimp? – Diversity and Variation in Microbial Communities Colonizing Broods of the Vent Shrimp *Rimicaris exoculata* During Embryonic Development," *Front. Microbiol.*, vol. 10, no. April, pp. 1–19, 2019, doi: 10.3389/fmicb.2019.00808.
- [39] I. Hernández-Ávila, M.-A. Cambon-Bonavita, J. Sarrazin, and F. Pradillon, "Population structure and reproduction of the alvinocaridid shrimp *Rimicaris exoculata* on the Mid-Atlantic Ridge: variations between habitats and vent fields," *bioRxiv*, pp. 3–5, 2021.
- [40] M. Guri *et al.*, "Acquisition of epibiotic bacteria along the life cycle of the hydrothermal shrimp *Rimicaris exoculata*," *ISME J.*, vol. 6, no. 3, pp. 597–609, 2012, doi: 10.1038/ismej.2011.133.

- [41] K. Pabortsava *et al.*, “Carbon sequestration in the deep Atlantic enhanced by Saharan dust,” *Nat. Geosci.*, vol. 10, no. 3, pp. 189–194, 2017, doi: 10.1038/ngeo2899.
- [42] N. C. Harms, N. Lahajnar, B. Gaye, T. Rixen, U. Schwarz-Schampera, and K. C. Emeis, “Sediment trap-derived particulate matter fluxes in the oligotrophic subtropical gyre of the South Indian Ocean,” *Deep. Res. Part II Top. Stud. Oceanogr.*, vol. 183, no. January, p. 104924, 2021, doi: 10.1016/j.dsr2.2020.104924.
- [43] . R Core Team, “R: A language and environment for statistical computing,” 2020. <https://www.r-project.org>.
- [44] E. Ramirez-Llodra and M. Segonzac, “Reproductive biology of *Alvinocaris muricola* (Decapoda: Caridea: Alvinocarididae) from cold seeps in the Congo Basin,” *J. Mar. Biol. Assoc. United Kingdom*, vol. 86, no. 06, p. 1347, 2006, doi: 10.1017/S0025315406014378.
- [45] I. Hernández-Ávila, M. A. Cambon-Bonavita, and F. Pradillon, “Morphology of first zoeal stage of four genera of alvinocaridid shrimps from hydrothermal vents and cold seeps: Implications for ecology, larval biology and phylogeny,” *PLoS One*, vol. 10, no. 12, pp. 1–27, 2015, doi: 10.1371/journal.pone.0144657.
- [46] A. M. Mat, “Chronobiology and the design of marine biology experiments,” *ICES J. Mar. Sci.*, vol. 76, no. 1, pp. 60–65, 2019, doi: 10.1093/icesjms/fsy131.
- [47] C. Schmidt, N. Le Bris, and F. Gaill, “Interactions of Deep-Sea Vent Invertebrates with Their Environment: The Case of *Rimicaris exoculata*,” *J. Shellfish Res.*, vol. 27, no. 1, pp. 79–90, 2008, doi: 10.2983/0730-8000(2008)27[79:IODVIW]2.0.CO;2.
- [48] T. Barreyre, J. Escartin, R. A. Sohn, M. Cannat, V. Ballu, and W. C. Crawford, “Temporal variability and tidal modulation of hydrothermal exit-fluid temperatures at the Lucky Strike deep-sea vent field, Mid-Atlantic Ridge,” *J. Geophys. Res. Solid Earth*, vol. 119, pp. 2543–2566, 2014, doi: 10.1002/2013JB010478.
- [49] D. Cuvelier, P. Legendre, A. Laës-Huon, P. M. Sarradin, and J. Sarrazin, “Biological and environmental rhythms in (dark) deep-sea hydrothermal ecosystems,” *Biogeosciences*, vol. 14, no. 12, pp. 2955–2977, 2017, doi: 10.5194/bg-14-2955-2017.
- [50] A. M. Mat *et al.*, “Biological rhythms in the deep-sea hydrothermal mussel *Bathymodiolus azoricus*,” *Nat. Commun.*, vol. 11, no. 1, pp. 1–12, 2020, doi: 10.1038/s41467-020-17284-4.
- [51] T. Komai and M. Segonzac, “Review of the hydrothermal vent shrimp genus *Mirocaris*, redescription of *M. fortunata* and reassessment of the taxonomic status of the family Alvinocarididae (Crustacea : Decapoda : Caridea),” *Cah. Biol. Mar.*, vol. 44, no. 2, pp. 199–215, 2003, doi: 10.21411/CBM.A.B886EA84.
- [52] P. Methou, “Lifecycles of two hydrothermal vent shrimps from the Mid-Atlantic Ridge: *Rimicaris exoculata* and *Rimicaris chacei*,” 2019.
- [53] T. Komai and S. Tsuchida, “New records of Alvinocarididae (Crustacea: Decapoda: Caridea) from the southwestern Pacific hydrothermal vents, with descriptions of one new genus and three new species,” *J. Nat. Hist.*, no. April 2015, pp. 1–36, 2015, doi: 10.1080/00222933.2015.1006702.
- [54] T. Komai, L. Menot, and M. Segonzac, “New records of caridean shrimp (Crustacea: Decapoda) from hydrothermally influenced fields off Futuna Island, Southwest Pacific, with description of a new species assigned to the genus *Alvinocaridinides* Komai & Chan, 2010,” *Zootaxa*, vol. 4098, no. 2, pp. 298–310, 2016, doi: 10.11646/zootaxa.4098.2.5.



- [55] C. L. Van Dover *et al.*, “Scientific Rationale and International Obligations for Protection of Active Hydrothermal Vent Ecosystems From Deep-Sea Mining,” *Mar. Policy*, vol. 90, no. January, pp. 20–28, 2018, doi: 10.1016/j.marpol.2018.01.020.
